# Supplementary material for: Immunomodulatory response to neoadjuvant nivolumab in non-metastatic clear cell renal cell carcinoma
Source: PubMed Central journal article supplement (PMC10792074; doi:10.1038/s41598-024-51889-9), 2024-01-17

# Supplemental Figure 1

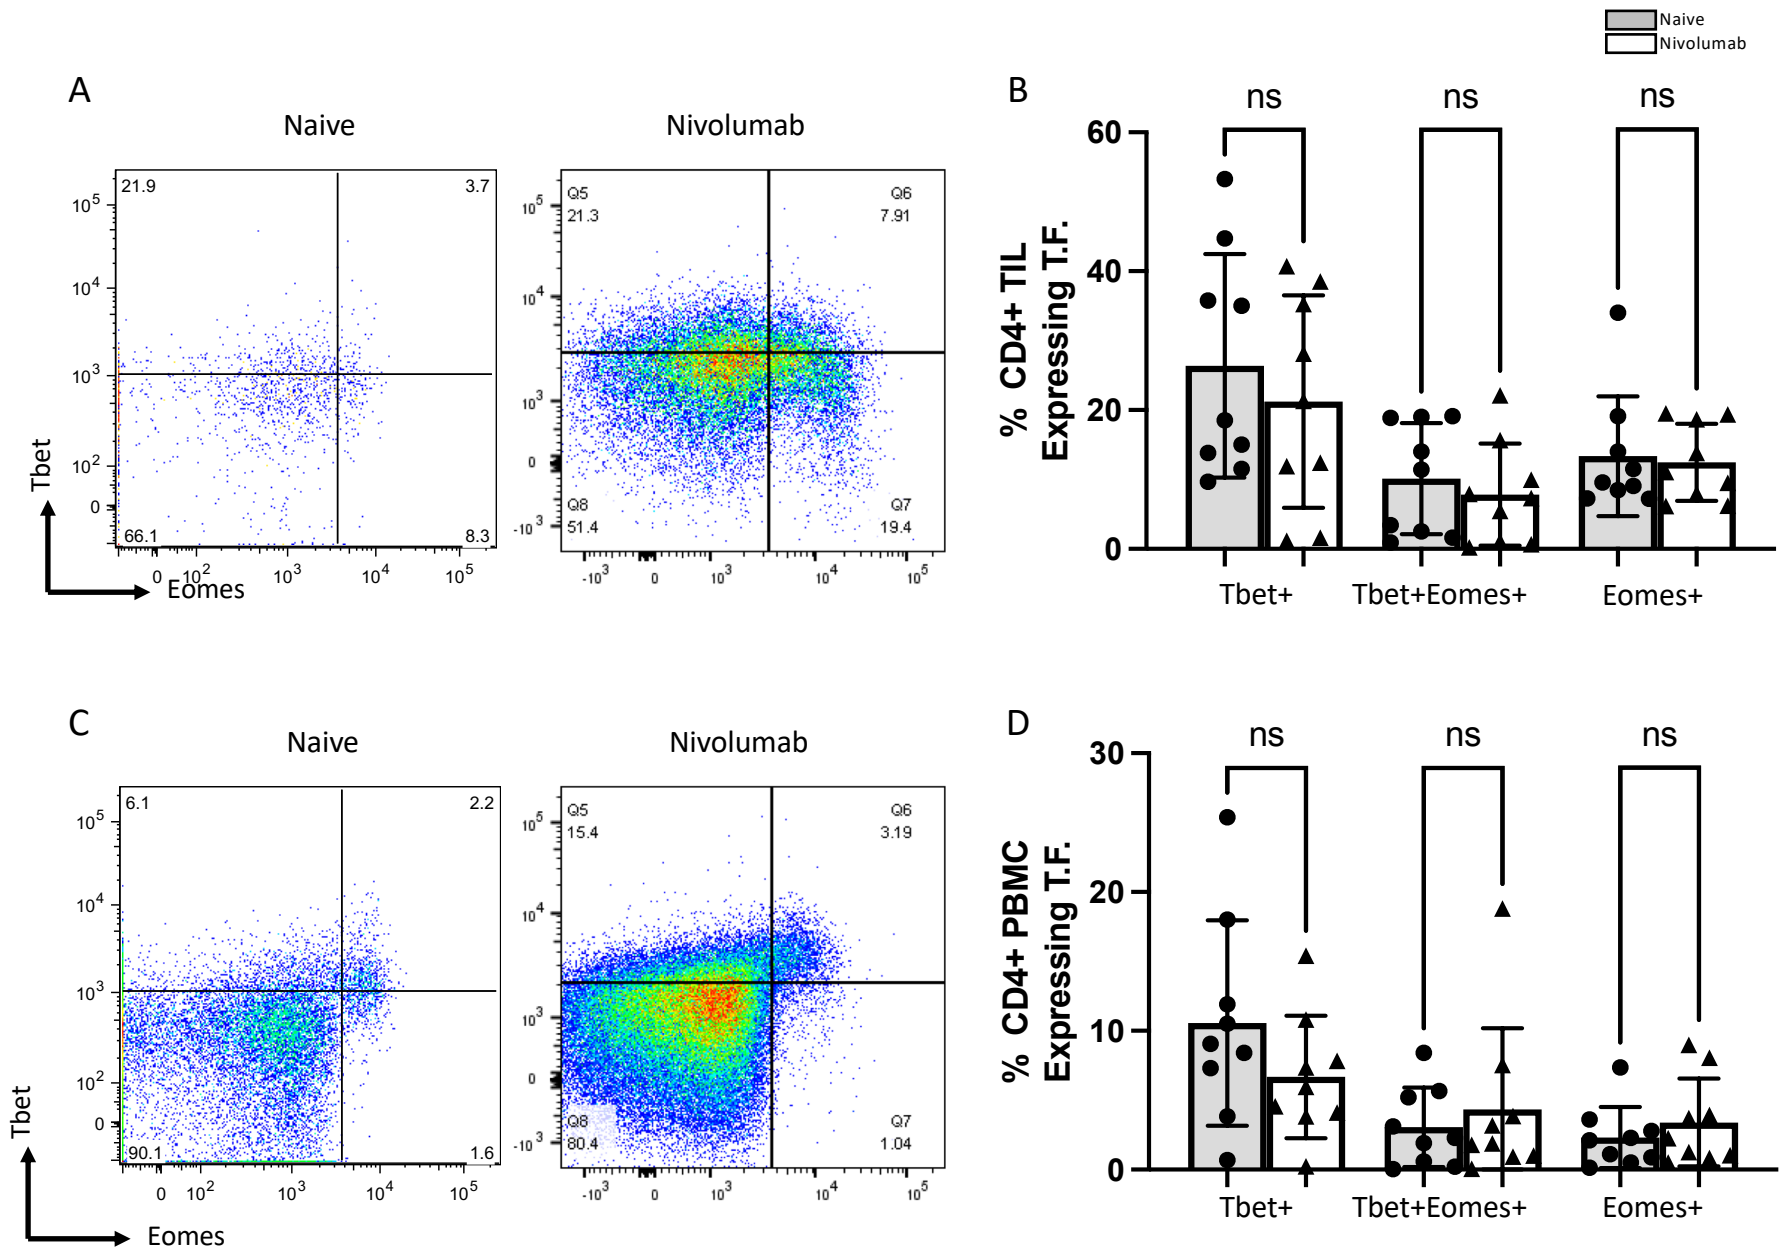

# Supplemental Figure 2

A

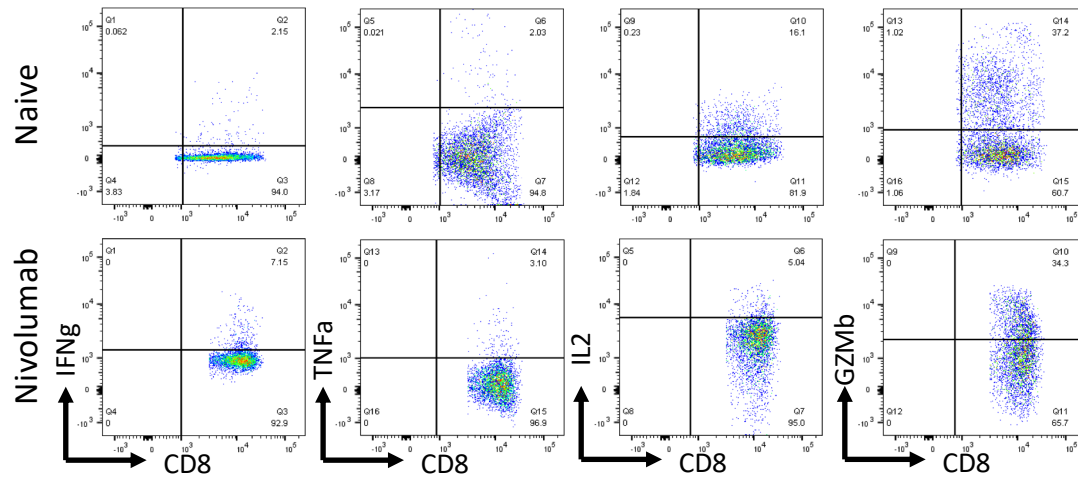

B

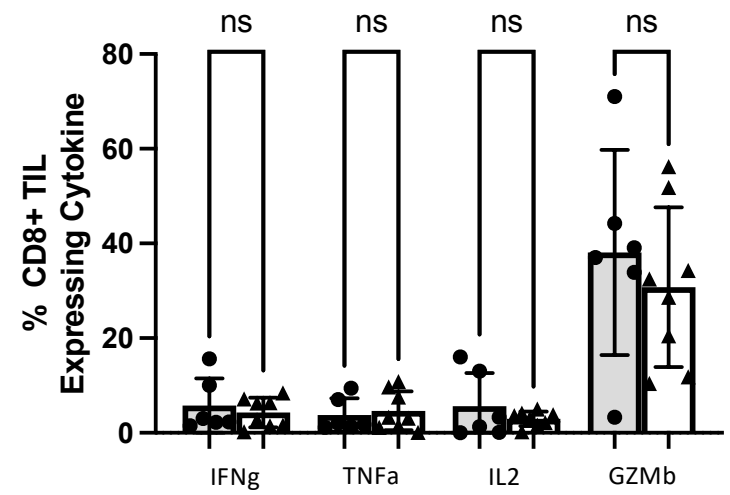

C

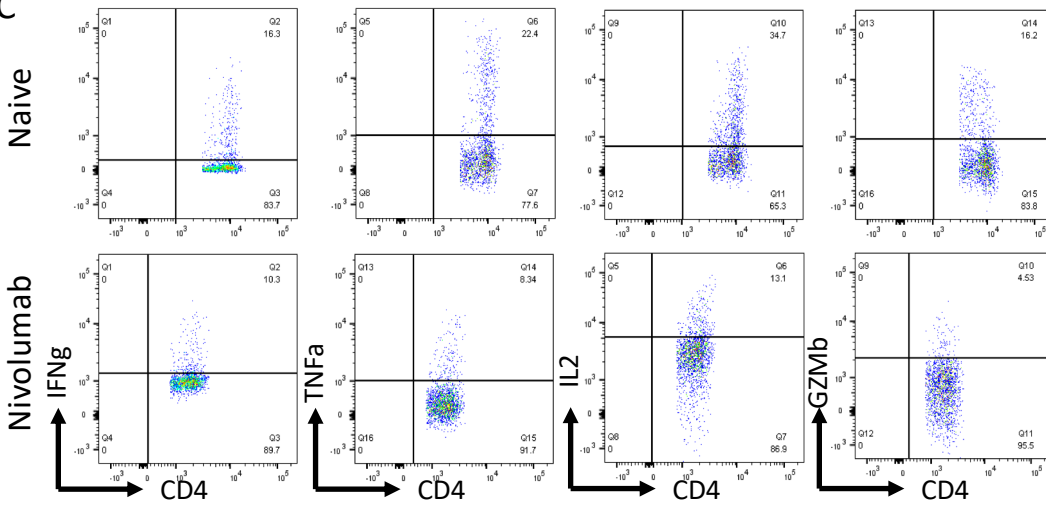

D

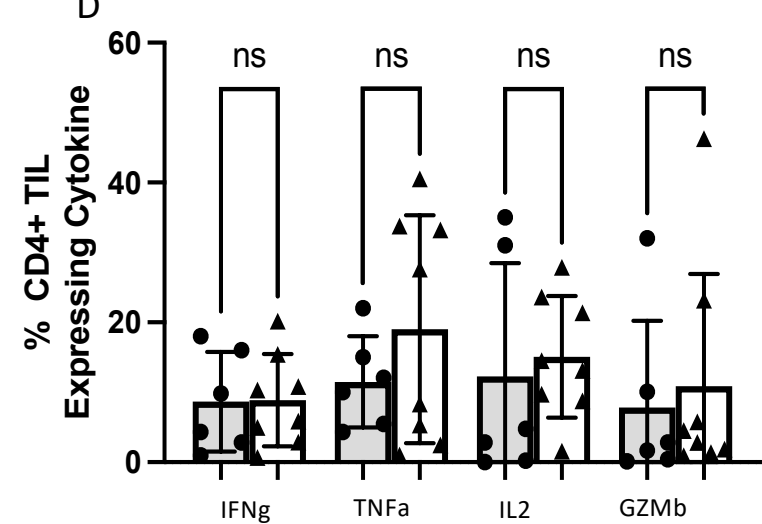

# Supplemental Figure 3

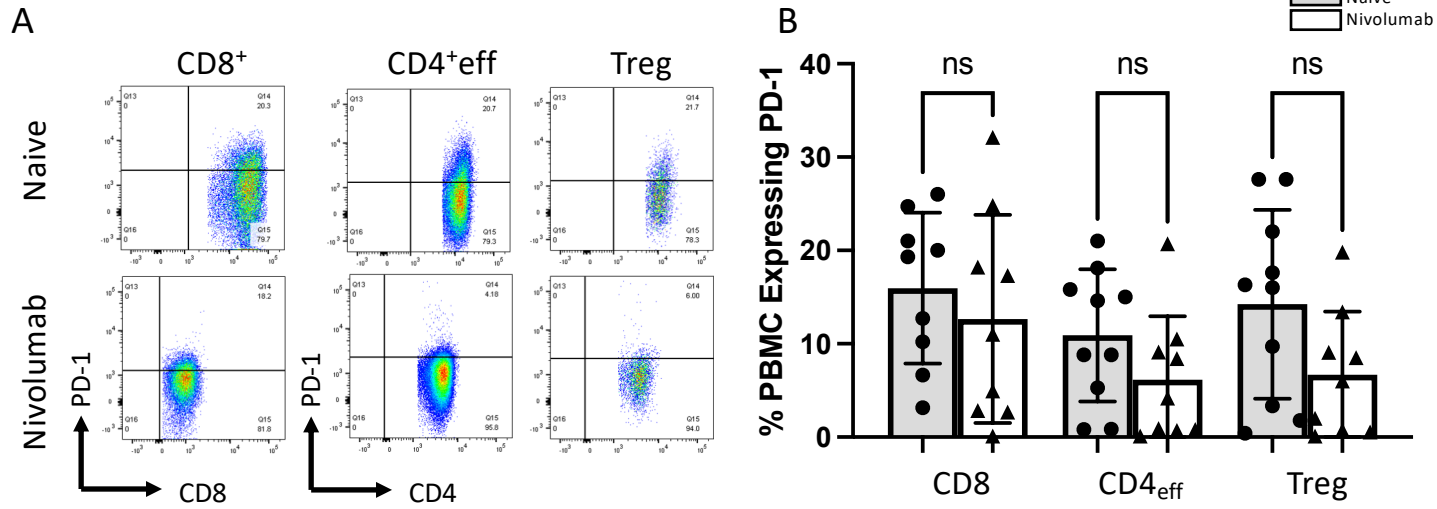

# Supplemental Figure 4

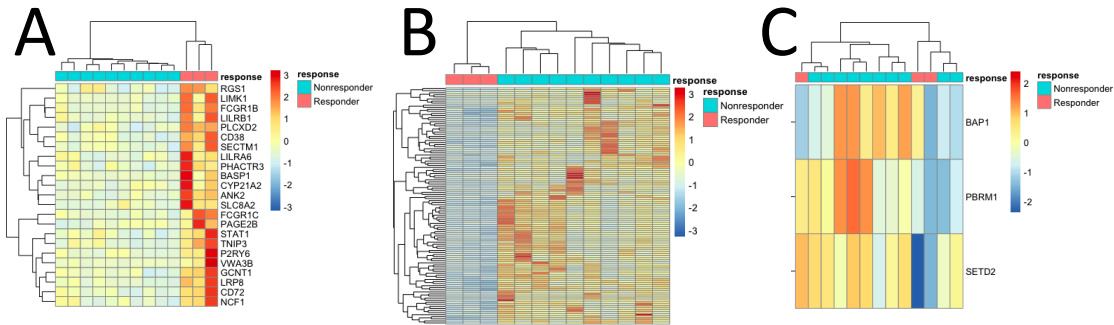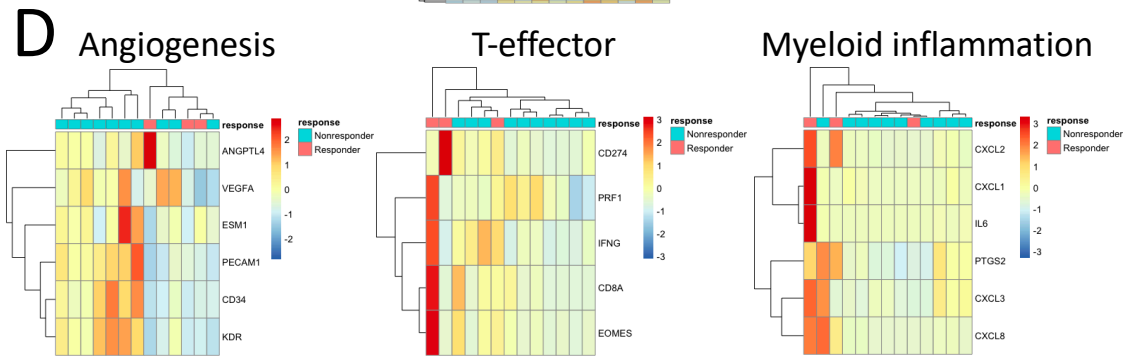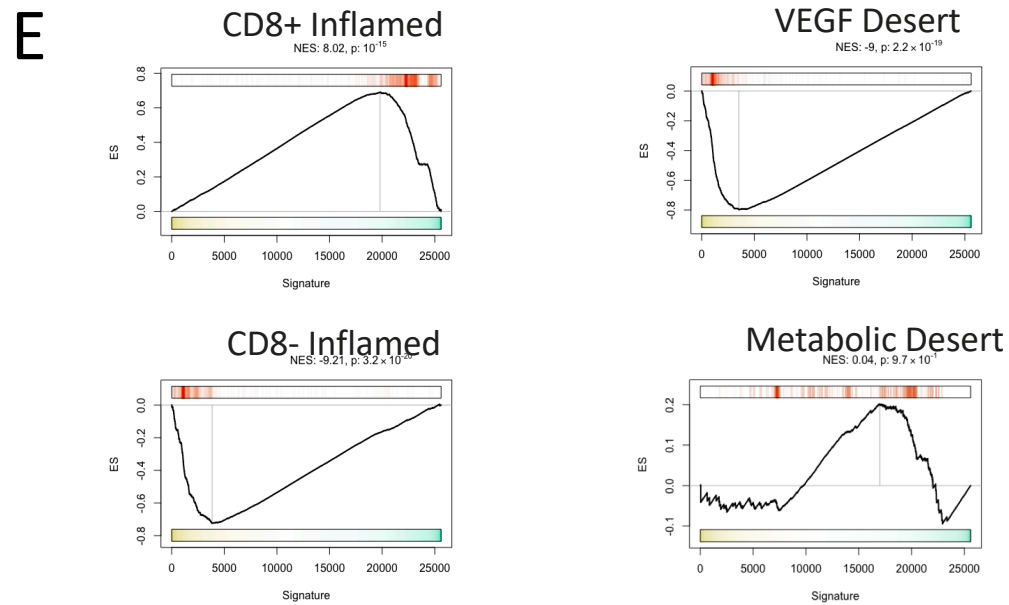

Supplement: 41598_2024_51889_MOESM1_ESM.pdf [file 41598_2024_51889_MOESM1_ESM.pdf]
